# Supplementary material
Source: PubMed Central journal article supplement (PMC8791316)
Supplement: KID.0007082020SupplementaryData.pdf [file KID.0007082020SupplementaryData.pdf]

## **Supplemental Material**

### **Table of Contents**

Table 1. RECORD checklist of recommendations for the reporting of studies conducted using routinely collected health data

Table 2. List of variables and data sources

Table 3. Diabetes care gaps

Figure 1. Flow diagram of inclusions and exclusions

**Table 1. RECORD checklist of recommendations for the reporting of studies conducted using routinely collected health data**

|                      | Item No | Recommendation                                                                                                                                                                                                                     | Reported                       |
|----------------------|---------|------------------------------------------------------------------------------------------------------------------------------------------------------------------------------------------------------------------------------------|--------------------------------|
| Title and abstract   | 1       | 1.1 The type of data used should be specified in the title or abstract. When possible, the name of the databases should be included.                                                                                               | Abstract                       |
|                      |         | 1.2 If applicable, the geographic region and time frame within which the study took place should be reported in the title or abstract.                                                                                             | Abstract                       |
|                      |         | 1.3 If linkage between databases was conducted for the study, this should be clearly stated in the title or abstract                                                                                                               | Abstract                       |
| Introduction         |         |                                                                                                                                                                                                                                    |                                |
| Background/rationale | 2       | Explain the scientific background and rationale for the investigation being reported                                                                                                                                               | Introduction                   |
| Objectives           | 3       | State specific objectives, including any pre-specified hypotheses                                                                                                                                                                  | Introduction                   |
| Methods              |         |                                                                                                                                                                                                                                    |                                |
| Study design         | 4       | Present key elements of study design early in the paper                                                                                                                                                                            | Methods                        |
| Setting              | 5       | Describe the setting, locations, and relevant dates, including periods of recruitment, exposure, follow-up, and data collection                                                                                                    | Methods                        |
| Participants         | 6       | 6.1 The methods of study population selection should be listed in detail. If this is not possible, an explanation should be provided.                                                                                              | Methods                        |
|                      |         | 6.2 Any validation studies of the codes or algorithms used to select the population should be referenced. If validation was conducted for this study and not published elsewhere, detailed methods and results should be provided. | Methods                        |
|                      |         | 6.3 If the study involved linkage of databases, consider use of a flow diagram or other graphical display to demonstrate the linkage process, including the number of individuals with linked data at each stage.                  | Supplemental Material Figure 1 |
| Variables            | 7       | A complete list of codes and algorithms used to classify exposures, outcomes, confounders, and effect modifiers should be provided. If these cannot be reported, an explanation should be provided.                                | Supplemental Material Table 2  |

|                                        |    |                                                                                                                                                                                                                                                                                                    |                                              |
|----------------------------------------|----|----------------------------------------------------------------------------------------------------------------------------------------------------------------------------------------------------------------------------------------------------------------------------------------------------|----------------------------------------------|
| Data sources/<br>measurement           | 8  | For each variable of interest, give sources of data and details of methods of assessment (measurement). Describe comparability of assessment methods if there is more than one group                                                                                                               | Methods, Supplemental Material Table 2 and 3 |
| Bias                                   | 9  | Describe any efforts to address potential sources of bias                                                                                                                                                                                                                                          | Methods                                      |
| Study size                             | 10 | Explain how the study size was arrived at                                                                                                                                                                                                                                                          | Methods, Supplemental Material Figure 1      |
| Quantitative variables                 | 11 | Explain how quantitative variables were handled in the analyses. If applicable, describe which groupings were chosen and why                                                                                                                                                                       | Tables 1-4                                   |
| Statistical methods                    | 12 | 12.1 Describe all statistical methods, including those used to control for confounding                                                                                                                                                                                                             | Methods                                      |
|                                        |    | 12.2 Describe any methods used to examine subgroups and interactions                                                                                                                                                                                                                               | Methods                                      |
|                                        |    | 12.3 Explain how missing data were addressed                                                                                                                                                                                                                                                       | Methods, Table 1 and Table 3                 |
|                                        |    | 12.4 If applicable, explain how loss to follow-up was addressed                                                                                                                                                                                                                                    | Methods                                      |
| 12.5 Describe any sensitivity analyses |    | Not applicable                                                                                                                                                                                                                                                                                     |                                              |
| Data access and cleaning methods       |    | 12.6 Authors should describe the extent to which the investigators had access to the database population used to create the study population.                                                                                                                                                      | Methods                                      |
|                                        |    | 12.7 Authors should provide information on the data cleaning methods used in the study                                                                                                                                                                                                             | Methods, Supplemental Materials Figure 1     |
| Linkage                                |    | 12.8 State whether the study included person-level, institutional-level, or other data linkage across two or more databases. The methods of linkage and methods of linkage quality evaluation should be provided.                                                                                  | Methods, Supplemental Materials Figure 1     |
| Results                                |    |                                                                                                                                                                                                                                                                                                    |                                              |
| Participants                           | 13 | 13.1 Describe in detail the selection of the persons included in the study (i.e. study population selection), including filtering based on data quality, data availability, and linkage. The selection of included persons can be described in the text and/or by means of the study flow diagram. | Results, Supplemental Materials Figure 1     |
| Descriptive data                       | 14 | 14.1 Give characteristics of study participants (e.g. demographic, clinical, social) and information on exposures and potential confounders                                                                                                                                                        | Results, Tables 1-4                          |

|                                                          |    |                                                                                                                                                                                                                                                                                            |                                                                                                                                 |
|----------------------------------------------------------|----|--------------------------------------------------------------------------------------------------------------------------------------------------------------------------------------------------------------------------------------------------------------------------------------------|---------------------------------------------------------------------------------------------------------------------------------|
|                                                          |    | 14.2 Indicate number of participants with missing data for each variable of interest                                                                                                                                                                                                       | Table 1 and Table 3                                                                                                             |
|                                                          |    | 14.3 Summarize follow-up time (e.g. average and total amount)                                                                                                                                                                                                                              | Results                                                                                                                         |
| Outcome data                                             | 15 | Report numbers of outcome events or summary measures over time                                                                                                                                                                                                                             | Results, Table 2                                                                                                                |
| Main results                                             | 16 | 16.1 Give unadjusted estimates and, if applicable, confounder-adjusted estimates and their precision (e.g. 95% confidence interval). Make clear which confounders were adjusted for and why they were included                                                                             | Results, Table 2-4                                                                                                              |
|                                                          |    | 16.2 Report category boundaries when continuous variables were categorized                                                                                                                                                                                                                 | Tables 1-4                                                                                                                      |
|                                                          |    | 16.3 If relevant, consider translating estimates of relative risk into absolute risk for a meaningful time period                                                                                                                                                                          | Not applicable                                                                                                                  |
| Other analyses                                           | 17 | Report other analyses done—e.g. analyses of subgroups and interactions, and sensitivity analyses                                                                                                                                                                                           | Results, Table 3, Figure 1                                                                                                      |
| Discussion                                               |    |                                                                                                                                                                                                                                                                                            |                                                                                                                                 |
| Key results                                              | 18 | Summarize key results with reference to study objectives                                                                                                                                                                                                                                   | Discussion                                                                                                                      |
| Limitations                                              | 19 | Discuss the implications of using data that were not created or collected to answer the specific research question(s). Include discussion of misclassification bias, unmeasured confounding, missing data and changing eligibility over time, as they pertain to the study being reported. | Discussion                                                                                                                      |
| Interpretation                                           | 20 | Give a cautious overall interpretation of results considering objectives, limitations, multiplicity of analyses, results from similar studies, and other relevant evidence                                                                                                                 | Discussion                                                                                                                      |
| Generalizability                                         | 21 | Discuss the generalizability (external validity) of the study results                                                                                                                                                                                                                      | Discussion                                                                                                                      |
| Other information                                        |    |                                                                                                                                                                                                                                                                                            |                                                                                                                                 |
| Funding                                                  | 22 | 22.1 Give the source of funding and the role of the funders for the present study and, if applicable, for the original study on which the present article is based                                                                                                                         | Acknowledgments                                                                                                                 |
| Accessibility of protocol, raw data and programming code |    | 22.2 Authors should provide information on how to access any supplemental information such as the study protocol, raw data, or programming code.                                                                                                                                           | The dataset from this study is held securely in coded form at ICES. While data sharing agreements prohibit ICES from making the |

|  |  |  |                                                                                                                                                                                                                                                                                                                                                                                                                |
|--|--|--|----------------------------------------------------------------------------------------------------------------------------------------------------------------------------------------------------------------------------------------------------------------------------------------------------------------------------------------------------------------------------------------------------------------|
|  |  |  | <p>dataset publicly available, access may be granted to those who meet pre-specified criteria for confidential access, available at <a href="http://www.ices.on.ca/DAS">www.ices.on.ca/DAS</a>. The full dataset creation plan and underlying analytic code are available from the authors upon request, understanding that the programs may rely upon coding templates or macros that are unique to ICES.</p> |
|--|--|--|----------------------------------------------------------------------------------------------------------------------------------------------------------------------------------------------------------------------------------------------------------------------------------------------------------------------------------------------------------------------------------------------------------------|

**Table 2. List of variables and data sources**

| <b>Variables</b>                           | <b>Data source</b>        | <b>Administrative codes</b>                                                                                            |
|--------------------------------------------|---------------------------|------------------------------------------------------------------------------------------------------------------------|
| Age                                        | RPDB                      | NA                                                                                                                     |
| Sex                                        | RPDB                      | NA                                                                                                                     |
| Race                                       | ORRS                      | NA                                                                                                                     |
| Rostered to family physician               | CAPE                      | NA                                                                                                                     |
| Income quintile                            | RPDB                      | NA                                                                                                                     |
| CKD/dialysis program                       | ORRS                      |                                                                                                                        |
| Distance to dialysis facility (km)         | RPDB                      | NA                                                                                                                     |
| Marginalization index                      | ON-MARG                   | NA                                                                                                                     |
| Long-term care                             | ODB                       | NA                                                                                                                     |
| Rural location                             | RPDB                      | NA                                                                                                                     |
| Duration of diabetes                       | ODD                       | NA                                                                                                                     |
| Duration of first ESKD prior to index date | ORRS<br>CORR              | NA                                                                                                                     |
| CAD                                        | CIHI-DAD<br>NACRS<br>OHIP | ICD10: I20, I21, I22, I23, I24, I25, Z955, Z958, Z959, R931, T822<br><br>CCI: 1IJ26, 1IJ27, 1IJ50, 1IJ54, 1IJ57, 1IJ76 |

|                       |                   |                                                                                                                                                                                                                        |
|-----------------------|-------------------|------------------------------------------------------------------------------------------------------------------------------------------------------------------------------------------------------------------------|
|                       |                   | OHIP Fee: R741, R742, R743, G298, E646, E651, E652, E654, E655, G262, Z434 ,Z448<br>OHIP Dx: 410 ,412 ,413                                                                                                             |
| Stroke/TIA            | CIHI-DAD<br>NACRS | ICD10: I62 ,I630 ,I631 ,I632, I633, I634, I635, I638, I639 ,I64, H341 ,I600 ,I601, I602 ,I603, I604, I605 ,I606, I607, I609, I61, G450 ,G451, G452, G453, G458, G459, H340                                             |
| CHF                   | CHF               | Diagnosis in CHF database as of the index date                                                                                                                                                                         |
| Foot Ulcer            | CIHI-DAD          | ICD10: E1070, E1071, E1170, E1171, E1370, E1371, E1470, E1471                                                                                                                                                          |
| Amputation            | CIHI-DAD          | CCI: 1VA93, 1VC93, 1VG93, IVQ93, 1WA93, 1WE93, 1WI93, 1WJ93, 1WK93, 1WL93, 1WM93, 1WN93, 1SN93, 1SQ93, 1TA93, 1TK93, 1TM93, 1TV93, 1UB93, 1UE93, 1UF93, 1UG93, 1UH93, 1UI93, 1UJ93, 1UK93, 1UM93                       |
| Depression or anxiety | CIHI-DAD          | ICD10: F063, F064, F313, F314, F315, F316, F320, F321, F322, F323, F328, F329, F330, F331, F332, F333, F338, F339, F340, F341, F348, F349, F380, F381, F388, F39, F410, F411, F412, F413, F418, F419, F204, F318, F319 |
| Hypoglycemia          | CIHI-DAD          | ICD10: E15, E160, E161, E162, E1063, E1163, E1363, E1463                                                                                                                                                               |
| Hyperglycemia         | CIHI-DAD          | ICD10: E1101, E131, E141, R739                                                                                                                                                                                         |
| Hypertension          |                   | ICD10: I10, I11, I12, I13, I15<br>OHIP Dx: 401, 402, 403                                                                                                                                                               |

|                                       |                  |                                                                                                                                                                                                                                                                                                                                                                                                                                                                                                                                                                                                                                                                                                                                                                                |
|---------------------------------------|------------------|--------------------------------------------------------------------------------------------------------------------------------------------------------------------------------------------------------------------------------------------------------------------------------------------------------------------------------------------------------------------------------------------------------------------------------------------------------------------------------------------------------------------------------------------------------------------------------------------------------------------------------------------------------------------------------------------------------------------------------------------------------------------------------|
| Retinopathy                           | CIHI-DAD         | ICD 10: H350, H352, H360, E10300, E10301, E10302, E10303, E10304, E10309, E1031, E10310, E10311, E10312, E10313, E10314, E10319, E10320, E10321, E10322, E10323, E10324, E10329, E1033, E10330, E10331, E10332, E10333, E10334, E10339, E10340, E10341, E10342, E10343, E10344, E10349, E1036, E1038, E10380, E10381, E10382, E10383, E10384, E10389, E10390, E10391, E10392, E10393, E10394, E10399, E1130, E11300, E11301, E11302, E11303, E11304, E11309, E1131, E11310, E11311, E11313, E11314, E11319, E1132, E11320, E11321, E11322, E11323, E11324, E11329, E1133, E11330, E11331, E11332, E11333, E11334, E11339, E11340, E11341, E11342, E11343, E11344, E11349, E1136, E1138, E11381, E11382, E11383, E11384, E11389, E11390, E11391, E11392, E11393, E11394, E11399 |
| Major cancer                          | CIHI-DAD<br>OHIP | IDC10: 971, 980, 982, 984, 985, 986, 987, 988, 989, 990, 991, 993, C15, C18, C19, C20, C22, C25, C34, C50, C56, C61, C82, C83, C85, C91, C92, C93, C94, C95, D00, D05, D010, D011, D012, D022, D075<br><br>OHIP Dx: 203, 204, 205, 206, 207, 208, 150, 154, 155, 157, 162, 174, 175, 183, 185                                                                                                                                                                                                                                                                                                                                                                                                                                                                                  |
| COPD                                  | COPD             | Diagnosis in COPD database as of the index date                                                                                                                                                                                                                                                                                                                                                                                                                                                                                                                                                                                                                                                                                                                                |
| Chronic liver disease                 | CIHI-DAD<br>OHIP | ICD 10: B16, B17, B18, B19, I85, R17, R18, R160, R162, B942, Z225, E831, E830, K70, K713, K714, K715, K717, K721, K729, K73, K74, K753, K754, K758, K759, K76, K77<br><br>OHIP Dx: 571, 573, 070<br><br>OHIP Fee: Z551, Z554                                                                                                                                                                                                                                                                                                                                                                                                                                                                                                                                                   |
| Dementia                              | DEMENTIA         | Diagnosis in DEMENTIA database as of the index date                                                                                                                                                                                                                                                                                                                                                                                                                                                                                                                                                                                                                                                                                                                            |
| Charlson comorbidity index            | CIHI-DAD         | NA                                                                                                                                                                                                                                                                                                                                                                                                                                                                                                                                                                                                                                                                                                                                                                             |
| Specialist visits in the 2 year prior | OHIP             | NA                                                                                                                                                                                                                                                                                                                                                                                                                                                                                                                                                                                                                                                                                                                                                                             |

|                                                             |             |                                                                             |
|-------------------------------------------------------------|-------------|-----------------------------------------------------------------------------|
| Primary care visits in the 2 years prior                    | OHIP        | NA                                                                          |
| Diabetes visit in the 2 years prior                         | OHIP        | Diagnostic code for diabetes (code 250) during an outpatient visit          |
| Physician SPECS who provided diabetes care in 2 years prior | OHIP        | Specialty of physician who administered code 250 during outpatient visit    |
| Number of unique physicians in the 2 years prior            | OHIP        | NA                                                                          |
| Number of ED visits in the 2 year prior                     | NACRS       | NA                                                                          |
| Number of hospitalizations in the 2 year prior              | CIHI-DAD    | NA                                                                          |
| HbA1c value                                                 | OLIS        | OLIS observation codes: 17855-8, 17856-6, 41995-2, 4548-4, 59261-8, 71875-9 |
| Diabetes medication prescriber                              | ODB<br>CPDB | Prescriber of last diabetes medication                                      |

Abbreviations: CAD, Coronary artery disease; CAPE, Client Agency Program Enrolment; CCI, Canadian Classification of Health Interventions; CHF, Congestive heart failure; CIHI-DAD, Canadian Institute for Health Information's Discharge Abstract Database; COPD, Chronic Obstructive Pulmonary Disease; CORR, Canadian Organ Replacement Registry; CPDB, Corporate Provider Database; Dx, Diagnostic; ICD, International Classification of Diseases; NACRS, National Ambulatory Care Reporting System Database; ODB, Ontario Drug Benefit; ODD, Ontario Diabetes Database; OHIP, Ontario Health Insurance Plan; ONMARG, Ontario Marginalization Index; OLIS, Ontario Laboratories Information System; ORRS, Ontario Renal Reporting System; TIA, transient ischemic attack, RPDB, Registered Persons Database

**Table 3. Diabetes Care Gaps**

| <b>Indicator 1</b> | <b>At least annual HbA1c</b>                                                                                                                                                                    | <b>Gap score</b> |
|--------------------|-------------------------------------------------------------------------------------------------------------------------------------------------------------------------------------------------|------------------|
| Data Sources       | OLIS                                                                                                                                                                                            |                  |
| Numerator          | 2 year lookback prior to Jan 1 2018 to determine the number of people with at least one HbA1c test per year<br><br>Note: 'Annual' is defined as at least 2 tests separated by at least 365 days |                  |
| Measures           | N(%) with:<br><br>No evidence of annual A1c test<br><br>At least annual A1c test                                                                                                                | 1<br><br>0       |
| <b>Indicator 2</b> | <b>Number of HbA1c tests</b>                                                                                                                                                                    |                  |
| Data Sources       | OLIS<br><br>Note: Restrict to 1 lab test per person per day                                                                                                                                     |                  |
| Numerator          | 2 year lookback prior to Jan 1 2018 to determine the number of people with more than eight HbA1c tests                                                                                          |                  |
| Measures           | N(%) with:<br><br>>8 A1c tests<br><br>≤8 A1c tests                                                                                                                                              | 1<br><br>0       |
| <b>Indicator 3</b> | <b>Diabetes eye exam</b>                                                                                                                                                                        |                  |
| Data sources       | OHIP<br><br>Optometrist SPEC=56<br><br>Ophthalmologist SPEC= 23<br><br>Restricted to only 1 relevant code per person per day.                                                                   |                  |
| Numerator          | 2 year lookback prior to Jan 1 2018 to determine the number of people with evidence of at least one screening eye exam.                                                                         |                  |

|                    |                                                                                                                                |        |
|--------------------|--------------------------------------------------------------------------------------------------------------------------------|--------|
| Measures           | N (%) with at least one vision exam over the 2 years<br>N (%) with no vision exam over 2 years                                 | 0<br>1 |
| <b>Indicator 4</b> | <b>Cardiac screening</b>                                                                                                       |        |
| Data sources       | OHIP                                                                                                                           |        |
| Numerator          | 2 year lookback prior to Jan 1 2018 to determine the number of people with evidence of at least one EKG or cardiac stress test |        |
| Measures           | N (%) with at least one EKG or stress test<br>N (%) with no EKG or stress test                                                 | 0<br>1 |
| <b>Indicator 5</b> | <b>Hospital encounter for hyperglycemia</b>                                                                                    |        |
| Data Sources       | CIHI-DAD (main diagnoses)<br>NACRS (main diagnoses)                                                                            |        |
| Numerator          | Look back from Jan 1 2018 to determine the number of patients with at least one hospital encounter for hyperglycemia           |        |
| Measures           | N(%) with hospital encounter<br>N(%) with no encounter                                                                         | 1<br>0 |
| <b>Indicator 6</b> | <b>Hospital encounter for hypoglycemia</b>                                                                                     |        |
| Data Sources       | CIHI-DAD (main diagnoses)<br>NACRS (main diagnoses)                                                                            |        |
| Numerator          | 2 year lookback prior to Jan 1 to determine the number of patients with at least one hospital encounter for hypoglycemia       |        |
| Measures           | N(%) with hospital encounter<br>N(%) with no encounter                                                                         | 1<br>0 |
| <b>Indicator 7</b> | <b>Hospital encounter for hypertension</b>                                                                                     |        |
| Data Sources       | CIHI-DAD (main diagnoses)                                                                                                      |        |

|           |                                                                                                                               |   |
|-----------|-------------------------------------------------------------------------------------------------------------------------------|---|
|           | NACRS (main diagnoses)                                                                                                        |   |
| Numerator | 2 year lookback prior to Jan 1 2018 to determine the number of patients with at least one hospital encounter for hypertension |   |
| Measures  | N(%) with hospital encounter                                                                                                  | 1 |
|           | N(%) with no encounter                                                                                                        | 0 |

Abbreviations: CIHI-DAD, Canadian Institute of Health Information’s Discharge Abstract Database; EKG, electrocardiogram; NACRS, National Ambulatory Care Reporting System Database; OHIP, Ontario Health Insurance Plan; OLIS, Ontario Laboratories Information System; SPEC, specialist code

**Figure 1. Flow chart participant inclusion**
